# Supplementary material
Source: PubMed Central journal article supplement (PMC5919120)
Supplement: NIHMS76458-supplement-1.pdf [file NIHMS76458-supplement-1.pdf]

# Supplementary Figure 1

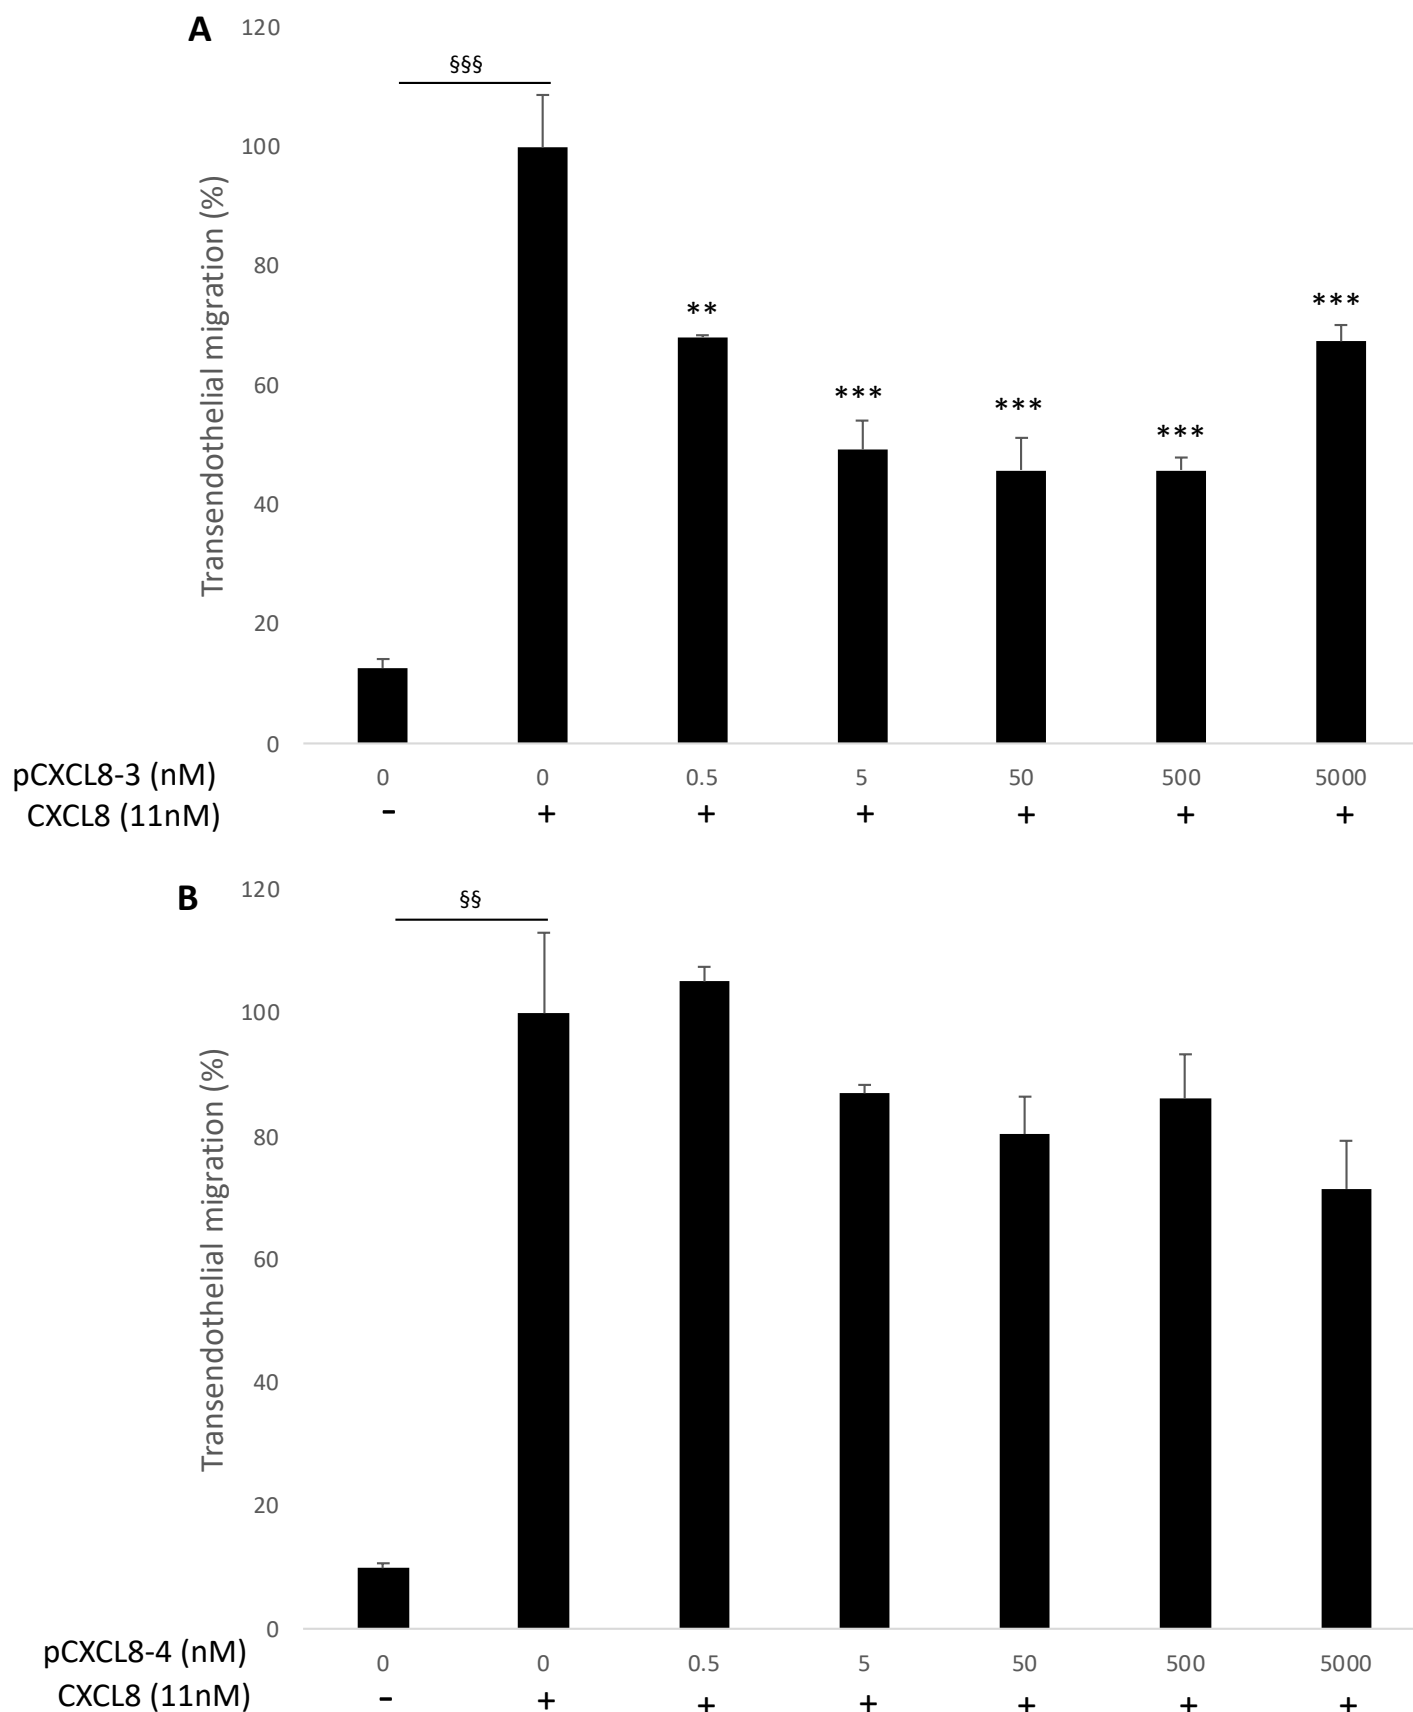

Supplementary Figure 1: Anti-chemotactic effects of pCXCL8-3 and pCXCL8-4 on leukocyte transendothelial migration.

Anti-chemotactic ability of peptides was tested in HCMEC/D3 cells. On the y axis percentage of neutrophil transendothelial migration in response to increasing concentration of peptide (nM) on the x axis. Indicated ( $\pm$ ) is the presence of 100 ng/ml chemokine. Data shown are mean transendothelial migration  $\pm$  SE (n=3). \*\*p<0.01, \*\*\*p<0.001 compared to chemokine alone in absence of peptide, §§p<0.01, §§§p<0.001. Percentage migration is calculated from the total number of cells added.
